# Supplementary material for: A new fluorescence probe comprising nitrogen-doped graphene quantum dots for the selective and quantitative determination of cerium(iv)
Source: Royal Society of Chemistry journal article supplement (doi:10.1039/c9nj04518j), 2019-12-16
Supplement: c9nj04518j1.pdf [file c9nj04518j1.pdf]

Electronic Supplementary Material (ESI) for New Journal of Chemistry.

This journal is © The Royal Society of Chemistry and the Centre National de la Recherche Scientifique 2019

## Supporting information

### **A New Fluorescence Probe of Nitrogen-doped Graphene Quantum Dots for The Selective and Quantitative Determination of Cerium (IV) Ion of The Rare Earth Element**

Xu Chu<sup>a</sup>, Shengnan Wang<sup>a</sup>, Yan Cao<sup>a,b\*</sup>

<sup>a</sup> College of Chemistry and Chemical Engineering, Anhui University, Hefei, 230601, China

<sup>b</sup> Guangzhou Institute of Energy Conversion, Chinese Academy of Sciences, Wushan,  
Guangzhou 510640, China

(Corresponding author. E-mail: [caoyan@ms.giec.ac.cn](mailto:caoyan@ms.giec.ac.cn))

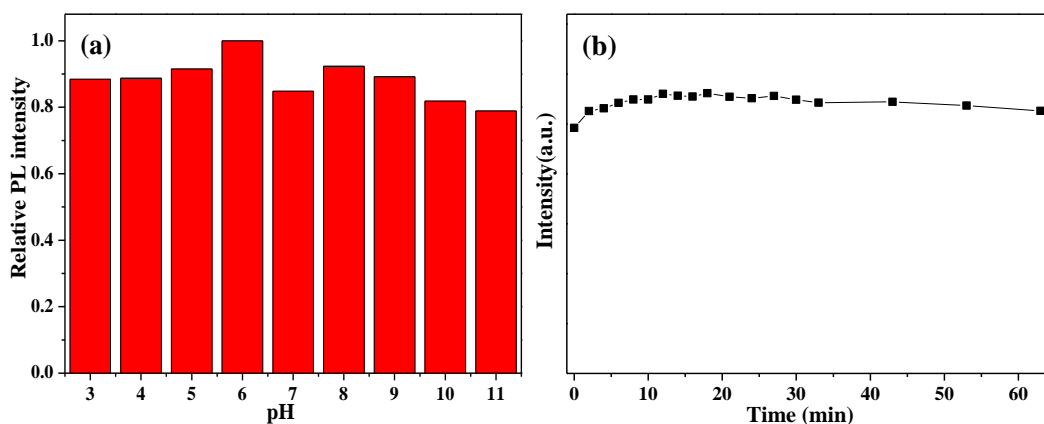

Fig. S1 (a) the relative PL intensity of the prepared N-GQDs at different pH values; Excitation wavelength: 320 nm; Emission wavelength: 450 nm. (b) The fluorescence intensity of the prepared N-GQDs during continuous excitation with a UV beam. Irradiation time covered from 0 to 60 mins.

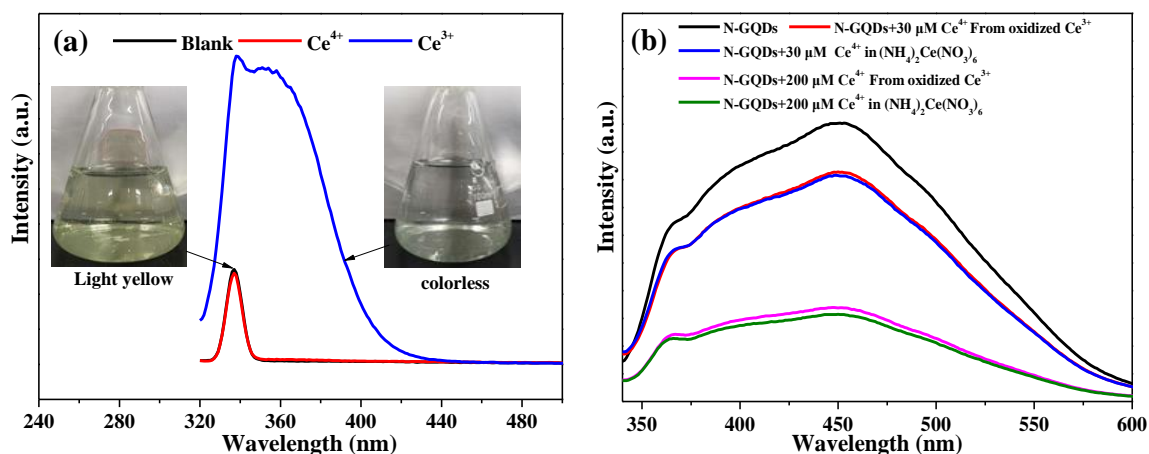

Fig. S2 (a) fluorescence responses of aqueous solution (black line). fluorescence responses of  $\text{Ce}^{4+}$  ions (red line). fluorescence responses of  $\text{Ce}^{3+}$  ions (red line).inset: photographs of the  $\text{Ce}^{4+}$  ions (left) and  $\text{Ce}^{3+}$  ions (right); The use of  $\text{Ce}^{4+}$  was from  $\text{Ce}^{3+}$  of  $\text{Ce}(\text{NO}_3)_3$  after its oxidation, and the evidence of  $\text{Ce}^{4+}$  was shown in Fig. S2a which exhibited the disappeared typical fluorescence peak of  $\text{Ce}^{3+}$  to support the existence of truly  $\text{Ce}^{4+}$  in  $\text{Ce}(\text{NO}_3)_3$ . (b) fluorescence responses of N-GQDs aqueous solution (0.015 mg/mL) (black line). The red line represents the FL changes of the prepared N-GQDs solution at the addition of  $\text{Ce}^{4+}$  ( $30 \mu\text{M}$ ). The blue line represents the FL changes of the prepared N-GQDs solution at the addition of  $(\text{NH}_4)_2\text{Ce}(\text{NO}_3)_6$  ( $30 \mu\text{M}$ ). The magenta line represents the FL changes of the prepared N-GQDs solution at the addition of  $\text{Ce}^{4+}$  ( $200 \mu\text{M}$ ) from  $\text{Ce}^{3+}$  of  $\text{Ce}(\text{NO}_3)_3$  after its oxidation. The olive line represents the FL changes of the prepared N-GQDs solution at the addition of  $(\text{NH}_4)_2\text{Ce}(\text{NO}_3)_6$  ( $200 \mu\text{M}$ ). We compared the fluorescence in following five cases, 1) the N-GQDs solution only, 2) and 3) the addition of the small amount of cerium (IV) in the N-GQDs solution in the presence or absence of the  $\text{NH}_4^+$  ion, 4)

and 5) the addition of the excessive amount of cerium (IV) in the N-GQDs solution in the presence or absence of the  $\text{NH}_4^+$  ion. Results were shown in Fig. S2b (ESI<sup>†</sup>), exhibiting the ignorant effect of the presence of the  $\text{NH}_4^+$  ion on the fluorescence system of the N-GQDs solution and cerium (IV), and only significant response of the fluorescence upon the addition of the  $\text{Ce}^{4+}$  ion in the N-GQDs solution whatever the  $\text{NH}_4^+$  ion presented.

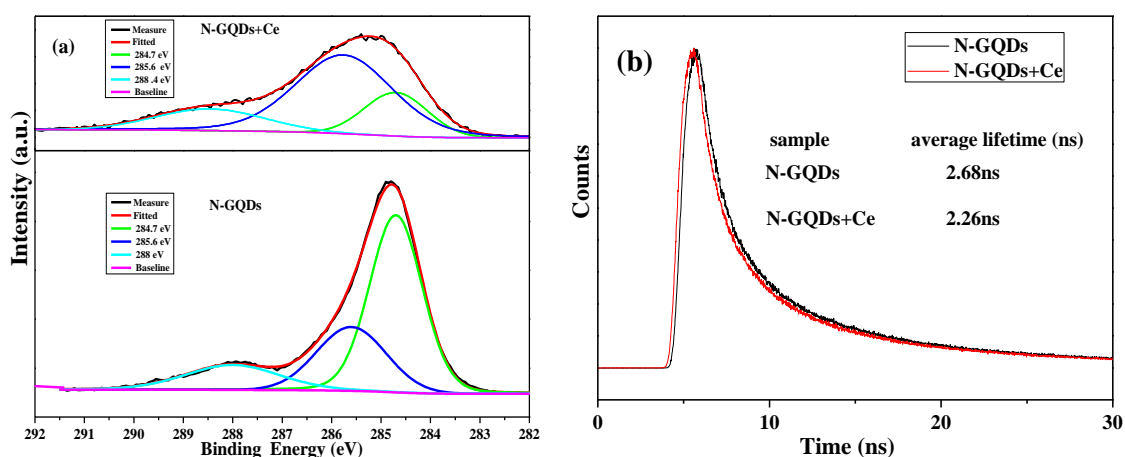

Fig. S3 (a) high resolution C1s XPS spectra of the N-GQDs before and after the addition of  $\text{Ce}^{4+}$ ; (b) the time-resolved fluorescence spectra of N-GQDs and N-GQDs-Ce with excitation wavelength of 286 nm and emission wavelength of 450 nm.

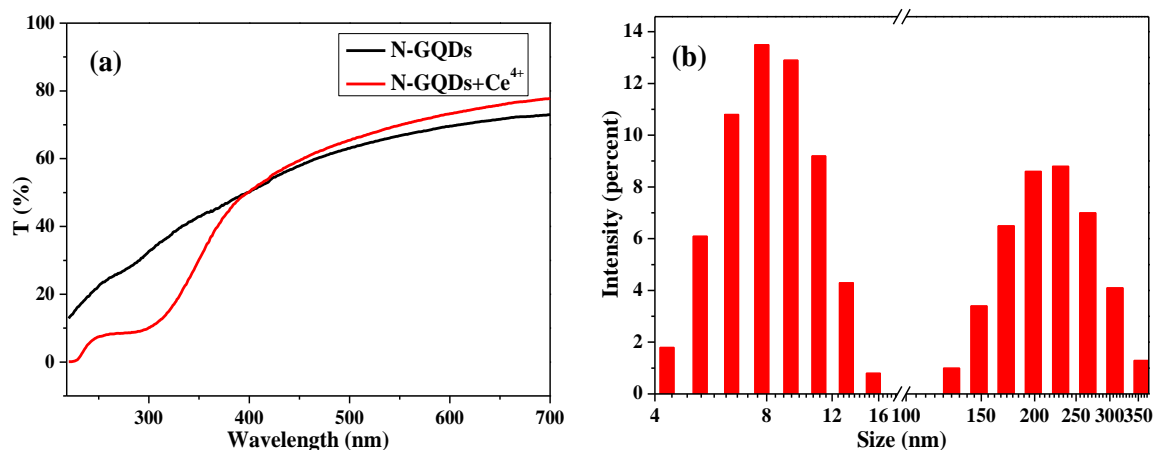

Fig. S4 (a) UV transmission spectra of N-GQDs (0.015 mg/mL) with and without  $\text{Ce}^{4+}$  ion (Concentration: 200  $\mu\text{M}$ ). (b) Dynamic light scattering analysis result of N-GQDs (0.015 mg/mL).
